# Supplementary material
Source: ML conference proceedings conference paper supplement (https://proceedings.neurips.cc/paper_files/paper/2020/hash/22eda830d1051274a2581d6466c06e6c-Abstract.html)
Supplement: Supplementary file [file 22eda830d1051274a2581d6466c06e6c-Supplemental.pdf]

In the entirety of the Appendix, we shall use  $\pi^*$  instead of  $\pi(\theta^*)$  for increased readability.

## A Definition of the operators

**Proposition 1.** Assuming all returns  $R(\tau)$  are positive, Eq. 2 can be seen as doing a gradient step to minimize  $KL(R\pi_t||\pi)$  with respect to  $\pi$ , where  $R\pi_t$  is the policy defined by

$$R\pi_t(\tau) = \frac{1}{J(\pi_t)} R(\tau)\pi_t(\tau). \quad (5)$$

Hence, the two operators associated with OP-REINFORCE are:

$$\mathcal{I}_\tau \pi(\tau) = R\pi(\tau) \quad , \quad \mathcal{P}_\tau \mu = \arg \min_{\pi \in \Pi} KL(\mu||\pi), \quad (6)$$

where  $\Pi$  is the set of realizable policies.

*Proof.* Denoting  $\mu$  the distribution over trajectories such that  $\mu(\tau) \propto R(\tau)\pi(\tau)$ , we have

$$KL(\mu||\pi) = \int_\tau \mu(\tau) \log \frac{\mu(\tau)}{\pi(\tau)} d\tau \quad (22)$$

$$\frac{\partial KL(\mu||\pi)}{\partial \theta} = - \int_\tau \mu(\tau) \nabla_\theta \log \pi(\tau) d\tau \quad (23)$$

$$\propto - \int_\tau R(\tau)\pi(\tau) \nabla_\theta \log \pi(\tau) d\tau \quad (24)$$

by definition of  $\mu(\tau)$ . □

**Proposition 3.** If all  $Q^\pi(s, a)$  are positive, Eq. 4 can be seen as doing a gradient step to minimize

$$D_{V^{\pi_t \pi_t}}(Q^{\pi_t \pi_t}||\pi) = \sum_s d^{\pi_t}(s) V^{\pi_t}(s) KL(Q^{\pi_t \pi_t}||\pi), \quad (7)$$

where  $D_{V^{\pi_t \pi_t}}$  and the distribution  $Q^\pi \pi$  over actions are defined as

$$D_z(\mu||\pi) = \sum_s z(s) KL(\mu(\cdot|s)||\pi(\cdot|s)), \quad (8)$$

$$Q^\pi \pi(a|s) = \frac{1}{\sum_{a'} Q^\pi(s, a') \pi(a'|s)} Q^\pi(s, a) \pi(a|s) = \frac{1}{V^\pi(s)} Q^\pi(s, a) \pi(a|s). \quad (9)$$

Hence, the two operators associated with the state-action formulation are:

$$\mathcal{I}_V \pi(s, a) = \left( \frac{1}{\mathbb{E}_\pi[V^\pi]} d^{\pi_t}(s) V^{\pi_t}(s) \right) Q^\pi \pi(a|s) \quad (10)$$

$$\mathcal{P}_V \mu = \arg \min_{z \in \Pi} \sum_s \mu(s) KL(\mu(\cdot|s)||z(\cdot|s)). \quad (11)$$

*Proof.*

$$\begin{aligned} \sum_s d^{\pi_t}(s) V^{\pi_t}(s) \frac{\partial KL(Q^{\pi_t \pi_t}||\pi)}{\partial \theta} &= - \sum_s d^{\pi_t}(s) V^{\pi_t}(s) \sum_a Q^\pi \pi_t(a|s) \nabla_\theta \log \pi(a|s) \\ &= - \sum_s d^{\pi_t}(s) \sum_a Q^\pi(s, a) \pi_t(a|s) \nabla_\theta \log \pi(a|s), \end{aligned} \quad (25)$$

and we recover the update of Eq. 4. □

## B $\pi^*$ is a stationary point when using the KL

**Proposition 2.**  $\pi(\theta^*)$  is a fixed point of  $\mathcal{P}_\tau \circ \mathcal{I}_\tau$ .

*Proof.* We have

$$\nabla_\theta KL(R\pi^* || \pi) \Big|_{\pi=\pi^*} = \int_\tau R(\tau)\pi^*(\tau)\nabla_\theta \log \pi^*(\tau) d\tau \quad (26)$$

$$= 0 \text{ by definition of } \pi^* . \quad (27)$$

□

**Proposition 4.**  $\pi(\theta^*)$  is a fixed point of  $\mathcal{P}_V \circ \mathcal{I}_V$ .

*Proof.* We have

$$\nabla_\theta \sum_s d^{\pi^*}(s)V^{\pi^*}(s)KL(Q^{\pi^*}\pi^* || \pi) \Big|_{\pi=\pi^*} = \sum_s d^{\pi^*}(s) \sum_a \pi^*(a|s)Q^{\pi^*}(s,a) \frac{\partial \log \pi_\theta(a|s)}{\partial \theta} \Big|_{\theta=\theta^*} \quad (28)$$

$$= 0 \text{ by definition of } \pi^* . \quad (29)$$

□

## C Expected return of the improved policy

We use the same proof for the following two propositions:

**Proposition 5.** The performance of the improved policy  $\mathcal{I}_\tau\pi$  is given by

$$J(\mathcal{I}_\tau\pi) = J(\pi) \left( 1 + \frac{\text{Var}_\pi(R)}{(\mathbb{E}_\pi[R])^2} \right) \geq J(\pi). \quad (12)$$

**Proposition 9.** Let  $f$  be an increasing function such that  $f(x) > 0$  for all  $x$ . Then

$$J(f(R)\pi) = J(\pi) + \frac{\text{Cov}_\pi(R, f(R))}{\mathbb{E}_\pi[f(R)]} \geq J(\pi). \quad (17)$$

*Proof.* We now show the expected return of the policy  $z\pi$ , defined as

$$z\pi(\tau) = \frac{1}{\int_{\tau'} z(\tau')\pi(\tau') d\tau'} z(\tau)\pi(\tau), \quad (30)$$

for any function  $z$  over trajectories. In particular, we show that choosing  $z = R$  leads to an improvement in the expected return.

$$J(z\pi) = \int_\tau R(\tau)(z\pi)(\tau) d\tau \quad (31)$$

$$= \int_\tau \frac{R(\tau)z(\tau)\pi(\tau)}{\int_{\tau'} z(\tau')\pi(\tau') d\tau'} d\tau \quad (32)$$

$$= \left( \int_{\tau'} R(\tau')\pi(\tau') d\tau' \right) \frac{\int_\tau R(\tau)z(\tau)\pi(\tau) d\tau}{\int_{\tau'} z(\tau')\pi(\tau') d\tau' \int_{\tau'} R(\tau')\pi(\tau') d\tau'} \quad (33)$$

$$= J(\pi) \frac{\mathbb{E}_\pi[Rz]}{\mathbb{E}_\pi[R]\mathbb{E}_\pi[z]} \quad (34)$$

$$= J(\pi) \left( 1 + \frac{\text{Cov}_\pi(R, z)}{\mathbb{E}_\pi[R]\mathbb{E}_\pi[z]} \right), \quad (35)$$

where  $\text{Cov}_\pi(R, z) = \mathbb{E}_\pi[Rz] - \mathbb{E}_\pi[R]\mathbb{E}_\pi[z]$ .

When  $z = R$ , the expected return becomes

$$J(R\pi) = J(\pi) \left( 1 + \frac{\text{Var}_\pi(R)}{(\mathbb{E}_\pi[R])^2} \right) \quad (36)$$

$$\geq J(\pi). \quad (37)$$

□

## D $\pi^*$ is a stationary point when using $\alpha$ -divergence

**Proposition 7.** Let  $\alpha \in (0, 1)$ . Then  $\pi(\theta^*)$  is a fixed point of  $\mathcal{P}_\tau^\alpha \circ \mathcal{I}_\tau^{\frac{1}{\alpha}}$  with  $\mathcal{P}_\tau^\alpha$  defined by

$$\mathcal{P}_\tau^\alpha \mu = \arg \min_{\pi \in \Pi} D^\alpha(\mu || \pi), \quad (15)$$

where  $D^\alpha$  is the  $\alpha$ -divergence or Rényi divergence of order  $\alpha$ .

*Proof.* We now show that  $\pi^*$  is the fixed point of  $\mathcal{P}_\tau^\alpha \circ \mathcal{I}_\tau^\alpha$ . The minimizer of  $d^\alpha$  with respect to its second argument can be computed through iterative minimization of  $D_{\alpha'}$  for any other nonzero  $\alpha'$  [10]:

$$z_{t+1} = \arg \min_z D_{\alpha'} \left( \pi^{\alpha/\alpha'} z_t^{1-\alpha/\alpha'} \middle| \middle| z \right). \quad (38)$$

In the remainder of this proof, we shall use  $\alpha' = 1$ , leading to

$$z_{t+1} = \arg \min_z KL(\pi^\alpha z_t^{1-\alpha} || z). \quad (39)$$

We know that  $\pi^*$  is a stationary point of  $\mathcal{P}_\tau^1 \circ \mathcal{I}_\tau^1$ , i.e.

$$\pi^* = \arg \min_z KL(R\pi^* || z). \quad (40)$$

Hence, we see that, if  $\pi^\alpha(\pi^*)^{1-\alpha} = R\pi^*$ , the iterative process described in Eq. 39 initialized with  $z_0 = \pi^*$  will be stationary with  $z_i = \pi^*$  for all  $i$ . This gives us the form we need for  $\pi = \mathcal{I}_\tau^\alpha \pi^*$ . Indeed, we must have

$$\pi^\alpha(\pi^*)^{1-\alpha} = R\pi^* \quad (41)$$

$$(\mathcal{I}^\alpha \pi^*)^\alpha (\pi^*)^{1-\alpha} = R\pi^* \quad (42)$$

$$\mathcal{I}^\alpha \pi^* = [R(\pi^*)^\alpha]^{1/\alpha} \quad (43)$$

$$= R^{1/\alpha} \pi^* \quad (44)$$

$$\mathcal{I}^\alpha = (\pi \rightarrow R^{1/\alpha} \pi). \quad (45)$$

□

**Proposition 8.** Let  $\alpha \in (0, 1)$ . Then  $\pi(\theta^*)$  is a fixed point of  $\mathcal{P}_V^\alpha \circ \mathcal{I}_V^{\frac{1}{\alpha}}$  with

$$\mathcal{I}_V^\alpha \pi = (Q^\pi)^{\frac{1}{\alpha}} \pi, \quad \mathcal{P}_{V,\pi}^\alpha \mu = \arg \min_{z \in \Pi} \sum_s d^\pi(s) Z_\mu^\pi(s) D^\alpha(\mu || z), \quad (16)$$

where  $Z_\alpha^\pi(s) = \sum_a \pi(a|s) Q^\pi(s, a)^{\frac{1}{\alpha}}$  is a normalization constant.

*Proof.* The proof is very similar to that of Proposition 7. We know that  $\pi^*$  is a stationary point of  $\mathcal{P}_V^1 \circ \mathcal{I}_V^1$ , i.e.

$$0 = \sum_s d^{\pi^*}(s) \sum_a \pi^*(a|s) Q^{\pi^*}(s, a) \frac{\partial \log \pi_\theta(a|s)}{\partial \theta} \bigg|_{\theta=\theta^*} \quad (46)$$

$$= \sum_s d^{\pi^*}(s) \sum_a \pi^*(a|s)^{1-\alpha} \left( \pi^*(a|s) Q^{\pi^*}(s, a)^{\frac{1}{\alpha}} \right)^\alpha \frac{\partial \log \pi_\theta(a|s)}{\partial \theta} \bigg|_{\theta=\theta^*} \quad (47)$$

$$= \sum_s d^{\pi^*}(s) Z_\alpha^{\pi^*}(s) \nabla_\theta KL \left( \left( \pi^*(\cdot|s) Q^{\pi^*}(s, \cdot)^{\frac{1}{\alpha}} \right)^\alpha \pi^*(a|s)^{1-\alpha} \middle| \middle| \pi \right) \bigg|_{\pi=\pi^*}, \quad (48)$$

where  $Z_\alpha(s) = \sum_a \pi^*(\cdot|s) Q^{\pi^*}(s, \cdot)^{\frac{1}{\alpha}}$  is the normalization constant. Hence, each iteration of Eq. 39 will leave  $\pi^*$  unchanged.

Hence, we see that, if  $\pi^\alpha(\pi^*)^{1-\alpha} = R\pi^*$ , the iterative process described in Eq. 39 initialized with  $z_0 = \pi^*$  will be stationary with  $z_i = \pi^*$  for all  $i$ . This gives us the form we need for  $\pi = \mathcal{I}^\alpha \pi^*$ . Indeed, we must have

$$\pi^\alpha(\pi^*)^{1-\alpha} = Q\pi^* \quad (49)$$

$$(\mathcal{I}^\alpha \pi^*)^\alpha(\pi^*)^{1-\alpha} = Q\pi^* \quad (50)$$

$$\mathcal{I}^\alpha \pi^* = [Q(\pi^*)^\alpha]^{1/\alpha} \quad (51)$$

$$= Q^{1/\alpha} \pi^* \quad (52)$$

$$\mathcal{I}^\alpha = (\pi \rightarrow Q^{1/\alpha} \pi). \quad (53)$$

□

## E Lower bounds

### E.1 Trajectory formulation

We state here the proposition for the trajectory formulation.

**Proposition 10** (Trajectory formulation). *For any two distributions  $\pi$  and  $\mu$ , we have*

$$J(\pi) \geq J(\mu) \left( 1 - KL(\mathcal{I}_\tau \mu || \pi) + KL(\mathcal{I}_\tau \mu || \mu) \right). \quad (54)$$

Hence, any policy  $\pi$  such that  $KL(\mathcal{I}_\tau \pi_t || \pi) < KL(\mathcal{I}_\tau \pi_t || \pi_t)$  implies  $J(\pi) > J(\pi_t)$ .

*Proof.* Let  $\pi$  and  $\mu$  be two arbitrary distributions over trajectories such that the support of  $\pi$  is included in that of  $\mu$ . Then

$$J(\pi) = \int_\tau R(\tau) \pi(\tau) d\tau \quad (55)$$

$$= \int_\tau R(\tau) \frac{\pi(\tau)}{\mu(\tau)} \mu(\tau) d\tau \quad (56)$$

$$\geq \int_\tau R(\tau) \left( 1 + \log \frac{\pi(\tau)}{\mu(\tau)} \right) \mu(\tau) d\tau \quad (57)$$

$$= \int_\tau R(\tau) \mu(\tau) d\tau + \int_\tau R(\tau) \mu(\tau) \log \pi(\tau) d\tau - \int_\tau R(\tau) \mu(\tau) \log \mu(\tau) d\tau \quad (58)$$

$$= J(\mu) - J(\mu) KL(R\mu || \pi) + J(\mu) KL(R\mu || \mu) \quad (59)$$

$$J(\pi) \geq J(\mu) \left( 1 - KL(R\mu || \pi) + KL(R\mu || \mu) \right). \quad (60)$$

□

### E.2 State-action formulation

To prove that minimizing Eq. 7 is equivalent to maximizing a lower bound on the expected return  $J$ , we shall show that this function has the same gradient as a lower bound  $J_\mu$  on  $J$  and thus only differs by a constant.

**Proposition 11.** *Let us define  $J_\mu$  as*

$$J_\mu(\pi) = \sum_{h=0}^H \gamma^h \int_\tau r(s_h, a_h) \left( 1 + \log \frac{\pi_h(\tau_h)}{\mu_h(\tau_h)} \right) \mu(\tau) d\tau, \quad (61)$$

where  $H$  is the horizon (which can be infinite),  $\tau_h$  is the trajectory of length  $h$  that is a prefix of the full trajectory  $\tau$ , and  $\pi_h(\tau_h)$  (resp.  $\mu_h(\tau_h)$ ) is the total probability mass of trajectories with prefix  $\tau_h$  under policy  $\pi$  (resp.  $\mu$ ).

Then we have  $J_\mu(\pi) \leq J(\pi)$  for any  $\mu$  and any  $\pi$  such that the support of  $\mu$  covers that of  $\pi$ .

*Proof.* We can rewrite

$$J(\pi) = \int_{\tau} R(\tau)\pi(\tau) d\tau \quad (62)$$

$$= \int_{\tau} \left( \sum_{h=0}^H \gamma^h r(s_h, a_h) \right) \pi(\tau) d\tau \quad (63)$$

$$= \sum_{h=0}^H \gamma^h \int_{\tau} r(s_h, a_h) \pi(\tau) d\tau \quad (64)$$

$$= \sum_{h=0}^H \gamma^h \int_{\tau} r(s_h, a_h) \pi_h(\tau_h) d\tau. \quad (65)$$

Then, using the same technique as for the trajectory formulation, we have

$$J(\pi) = \sum_{h=0}^H \gamma^h \int_{\tau} r(s_h, a_h) \frac{\pi_h(\tau_h)}{\mu_h(\tau_h)} \mu_h(\tau_h) d\tau \quad (66)$$

$$\geq \sum_{h=0}^H \gamma^h \int_{\tau} r(s_h, a_h) \left( 1 + \log \frac{\pi_h(\tau_h)}{\mu_h(\tau_h)} \right) \mu_h(\tau_h) d\tau \quad (67)$$

$$= \sum_{h=0}^H \gamma^h \int_{\tau} r(s_h, a_h) \left( 1 + \log \frac{\pi_h(\tau_h)}{\mu_h(\tau_h)} \right) \mu(\tau) d\tau \quad (68)$$

$$= J_{\mu}(\pi). \quad (69)$$

□

Then we can prove the following proposition:

**Proposition 6.** For any two policies  $\pi$  and  $\mu$  such that the support of  $\mu$  covers that of  $\pi$ , we have

$$J(\pi) \geq J(\mu) + \mathbb{E}_{\mu}[V^{\mu}(s)] [D_{\mu}(\mathcal{I}_V \mu || \mu) - D_{\mu}(\mathcal{I}_V \mu || \pi)] \quad (13)$$

$$= J(\mu) + \sum_s d^{\mu}(s) \sum_a Q^{\mu}(s, a) \mu(a|s) \log \frac{\pi(a|s)}{\mu(a|s)}. \quad (14)$$

Hence, any policy  $\pi$  such that  $D_{\pi_t}(\mathcal{I}_V \pi_t || \pi) < D_{\pi_t}(\mathcal{I}_V \pi_t || \pi_t)$  implies  $J(\pi) > J(\pi_t)$ .

*Proof.* Since  $J_{\mu}$  is a lower bound on  $J$ , by Proposition 11, we prove that its gradient is the same as that of

$$\nabla_{\theta} J_{\mu}(\pi) = \nabla_{\theta} \left( \sum_{h=0}^H \gamma^h \int_{\tau} r(s_h, a_h) \left( 1 + \log \frac{\pi_h(\tau_h)}{\mu_h(\tau_h)} \right) \mu(\tau) d\tau \right) \quad (70)$$

$$= \sum_{h=0}^H \gamma^h \int_{\tau} r(s_h, a_h) \nabla_{\theta} \log \pi_h(\tau_h) \mu(\tau) d\tau \quad (71)$$

$$= \sum_{h=0}^H \gamma^h \int_{\tau} r(s_h, a_h) \left( \sum_{h'=0}^h \nabla_{\theta} \log \pi(a_{h'} | s_{h'}) \right) \mu(\tau) d\tau \quad (72)$$

$$= \sum_{h'=0}^H \int_{\tau} \nabla_{\theta} \log \pi(a_{h'} | s_{h'}) \left( \sum_{h=h'}^H \gamma^h r(s_h, a_h) \right) \mu(\tau) d\tau \quad (73)$$

$$= \sum_{h'=0}^H \sum_s \sum_a \nabla_{\theta} \log \pi(a|s) d_{\mu}^{h'}(s) \mu(a|s) \gamma^{h'} Q^{\mu}(s, a) \quad (74)$$

$$= \sum_{h'=0}^H \gamma^{h'} \sum_s d_{\mu}^{h'}(s) \sum_a \nabla_{\theta} \log \pi(a|s) \mu(a|s) \gamma^{h'} Q^{\mu}(s, a) \quad (75)$$

$$= \sum_s d^\mu(s) \sum_a Q^\mu(s, a) \mu(a|s) \nabla_\theta \log \pi(a|s) \quad (76)$$

$$= \nabla_\theta \left( - \sum_s d^\mu(s) V^\mu(s) KL(Q^\mu \mu || \pi) \right). \quad (77)$$

Hence these two functions only differ by a constant. Using  $J_\pi(\pi) = \pi$ , we identify the constant as being  $J(\mu) + \mathbb{E}_\mu[V^\mu(s)]D_{\mathcal{I}_\mu}(\mu)$ .  $\square$

## F Experimental Details

We reiterate the details of our didactic empirical study in the four-room domain [22]. An agent starts in the lower-left corner and seeks to reach the upper-right corner; upon entering the goal state, the agent receives a reward of +1 and terminates the episode. The policy is parameterized by softmax probabilities,  $\pi_\theta(a|s) = \frac{\exp(\theta_a)}{\sum_{a \in \mathcal{A}} \exp(\theta_a)}$  for  $\theta \in \mathbb{R}^{|\mathcal{A}|}$ , where all states share the same parameters. As with our analysis, these experiments compute gradients and operators exactly; in practice, stochasticity from sampling and approximate value estimation can affect the resultant performance. In Figure F.2, we plot policies in the sub-segment  $\{[0.1, 0.8t, 0.8(1-t), 0.1] : t \in [0, 1]\}$ , denoting the probability of taking the down, left, up, and right actions respectively.

The linear approximation of conservative policy iteration (CPI) [5] presented in Fig. F.2 does not include the quadratic term in  $\alpha$  necessary to maintain the lower bound property (see Theorem 1 of [18]) as this term can be made arbitrarily large by setting  $\gamma$  arbitrarily close to 1. This makes algorithms like TRPO very conservative when optimizing the lower bound, leading them to optimize relaxations instead.

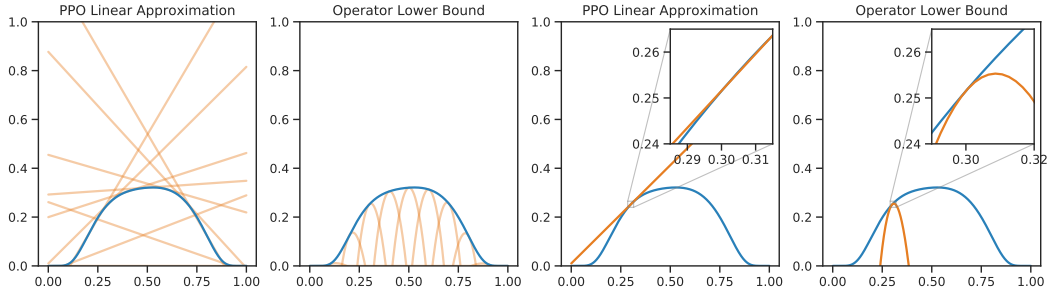

Figure F.2: We visualize the true objective  $J(\pi)$ , the operator lower bound (Proposition 6), and the linear approximation optimized by TRPO and PPO on a 1d subspace of the policy space for the four-room domain (details in Appendix F). On the left, we plot the auxiliary objectives corresponding to different choices of sampling  $\pi_t$ . On the right, the objectives are plotted locally around  $\pi_t$ .

### F.1 Multi-step operators with line search

Proposition 6 implies that the single-step improvement operator converges to a desired solution by demonstrating that it fully minimizes a lower bound on the expected return. As partial minimization of this lower-bound also implies convergence, we propose a line-search approach that chooses the minimum  $\alpha$  under which the lower-bound is optimized. Specifically, letting  $L_\mu(\pi)$  be the lower bound in Proposition 6, we choose the lowest alpha such that

$$L_\mu(\mu) - L_\mu(\mathcal{PI}^\alpha \mu) \geq \frac{1}{2} (L_\mu(\mu) - L_\mu(\mathcal{PI}^1 \mu)) \quad (78)$$
